# Supplementary material for: Determinants of wasting among children aged 6–59 months in North-East Ethiopia: a community-based case-control study
Source: HighWire-hosted journal article supplement (doi:10.1136/bmjopen-2021-057887), 2022-08-01
Supplement: bmjopen-2021-057887supp001_data_supplement.pdf [file bmjopen-2021-057887supp001_data_supplement.pdf]

**Annx1****English version Questionnaire:**

|                                                            |                                          |                                                                                                                                        |                  |
|------------------------------------------------------------|------------------------------------------|----------------------------------------------------------------------------------------------------------------------------------------|------------------|
| Woreda _____                                               |                                          |                                                                                                                                        |                  |
| Kebele _____                                               |                                          |                                                                                                                                        |                  |
| Data recorder name _____                                   |                                          | signature _____                                                                                                                        | date<br>__//__// |
| Code: ( 1) ca100-----<br>(1) co100-----<br>( 2) co100----- |                                          | Key ca= case<br>Co= control                                                                                                            |                  |
| <b>Sr. No</b>                                              | <b>Part 1: Socio-demographic factors</b> | <b>Categories of Response Options</b>                                                                                                  | <b>Skip</b>      |
| 100                                                        | Head of HHs                              | 1. Male    2. female                                                                                                                   |                  |
| 101                                                        | Marital status                           | 1. Married    2. Single    3. Divorced<br>4. Separated    5. Widowed                                                                   |                  |
| 102                                                        | Ethnicity                                | 1. Amhara    2. Oromo    3. others                                                                                                     |                  |
| 103                                                        | Religion                                 | 1. Orthodox    2. Muslim    3. Protestant<br>4. Catholic    5. Other specify                                                           |                  |
| 104                                                        | HHs with under 5yrs children             | No of U5 children in the HH-----<br>-----                                                                                              |                  |
| 105                                                        | Maternal Education                       | 1 Can't read and write<br>2. Can read and write (Informal education)<br>3. Primary education (1-8)<br>4. Secondary education and above |                  |

|       |                                                                                       |                                                                                                                                                              |      |
|-------|---------------------------------------------------------------------------------------|--------------------------------------------------------------------------------------------------------------------------------------------------------------|------|
|       |                                                                                       | 5.Higher education                                                                                                                                           |      |
| 106   | Paternal education                                                                    | 1 Can't read and write<br>2. Can read and write (Informal education)<br>3. Primary education (1-8)<br>4. Secondary education and above<br>5.Higher education |      |
| 107   | Occupation of mother                                                                  | Occupation type-----                                                                                                                                         |      |
| 108   | Occupation of husband                                                                 | Occupation type-----                                                                                                                                         |      |
| 109   |                                                                                       |                                                                                                                                                              |      |
| 110   | Decision making on use of money                                                       | Decision making by-----                                                                                                                                      |      |
| 111   | Ownership of livestock                                                                | yes 2. No                                                                                                                                                    |      |
| 112   | Livestock per household                                                               | No-----                                                                                                                                                      |      |
| 113   | Ownership of land                                                                     | Yes 2. No                                                                                                                                                    |      |
| 114   | Land by hectare per HH                                                                | Hectare-----                                                                                                                                                 |      |
| 115   | In the past four weeks, did you worry that your household would not have enough food? | 0 = No (skip to Q2)<br>1=Yes                                                                                                                                 | Code |
| 115.1 | How often did this happen?                                                            | 1 = Rarely (once or twice in the past four weeks)<br>2 = Sometimes (three to ten times in the past four weeks)                                               |      |

|       |                                                                                                                                                                                  |                                                                                                                                                                          |  |
|-------|----------------------------------------------------------------------------------------------------------------------------------------------------------------------------------|--------------------------------------------------------------------------------------------------------------------------------------------------------------------------|--|
|       |                                                                                                                                                                                  | 3 = Often (more than ten times in the past four weeks)                                                                                                                   |  |
| 116   | In the past four weeks, were you or any household member not able to eat the kinds of foods you preferred because of a lack of resources?                                        | 0 = No (skip to Q3)<br>1=Yes                                                                                                                                             |  |
| 116.2 | How often did this happen?                                                                                                                                                       | 1 = Rarely (once or twice in the past four weeks)<br>2 = Sometimes (three to ten times in the past four weeks)<br>3 = Often (more than ten times in the past four weeks) |  |
| 117   | In the past four weeks, did you or any household member have to eat a limited variety of foods due to a lack of resources?                                                       | 0 = No (skip to Q4)    1 = Yes                                                                                                                                           |  |
| 117.3 | How often did this happen?                                                                                                                                                       | 1 = Rarely (once or twice in the past four weeks)<br>2 = Sometimes (three to ten times in the past four weeks)<br>3 = Often (more than ten times in the past four weeks) |  |
| 118   | In the past four weeks, did you or any household member have to eat some foods that you really did not want to eat because of a lack of resources to obtain other types of food? | 0 = No (skip to Q5)    1 = Yes                                                                                                                                           |  |
| 119.4 | How often did this happen?                                                                                                                                                       | 1 = Rarely (once or twice in the past four weeks)                                                                                                                        |  |

|       |                                                                                                                                                |                                                                                                                                                                          |  |
|-------|------------------------------------------------------------------------------------------------------------------------------------------------|--------------------------------------------------------------------------------------------------------------------------------------------------------------------------|--|
|       |                                                                                                                                                | 2 = Sometimes (three to ten times in the past four weeks)<br>3 = Often (more than ten times in the past four weeks)                                                      |  |
| 120   | In the past four weeks, did you or any household member have to eat a smaller meal than you felt you needed because there was not enough food? | 0 = No (skip to Q6)<br>1 = Yes                                                                                                                                           |  |
| 120.5 | How often did this happen?                                                                                                                     | 1 = Rarely (once or twice in the past four weeks)<br>2 = Sometimes (three to ten times in the past four weeks)<br>3 = Often (more than ten times in the past four weeks) |  |
| 121   | In the past four weeks, did you or any other household member have to eat fewer meals in a day because there was not enough food?              | 0 = No (skip to Q7)<br>1 = Yes                                                                                                                                           |  |
| 121.6 | How often did this happen?                                                                                                                     | 1 = Rarely (once or twice in the past four weeks)<br>2 = Sometimes (three to ten times in the past four weeks)<br>3 = Often (more than ten times in the past four weeks) |  |
| 122   | In the past four weeks, did you or any other household member have to eat fewer meals in a day because there was not enough food?              | 0 = No (skip to Q7)<br>1 = Yes                                                                                                                                           |  |
| 122.7 | How often did this happen?                                                                                                                     | 1 = Rarely (once or twice in the past four weeks)                                                                                                                        |  |

|       |                                                                                                                                             |                                                                                                                                                                          |  |
|-------|---------------------------------------------------------------------------------------------------------------------------------------------|--------------------------------------------------------------------------------------------------------------------------------------------------------------------------|--|
|       |                                                                                                                                             | 2 = Sometimes (three to ten times in the past four weeks)<br>3 = Often (more than ten times in the past four weeks)                                                      |  |
| 123   | In the past four weeks, was there ever no food to eat of any kind in your household because of lack of resources to get food?               | 0 = No (skip to Q8)<br>1 = Yes                                                                                                                                           |  |
| 123.8 | How often did this happen?                                                                                                                  | 1 = Rarely (once or twice in the past four weeks)<br>2 = Sometimes (three to ten times in the past four weeks)<br>3 = Often (more than ten times in the past four weeks) |  |
| 124   | In the past four weeks, did you or any household member go to sleep at night hungry because there was not enough food?                      | 0 = No (skip to Q9)<br>1 = Yes                                                                                                                                           |  |
| 124.9 | How often did this happen? Occur                                                                                                            | 1 = Rarely (once or twice in the past four weeks)<br>2 = Sometimes (three to ten times in the past four weeks)<br>3 = Often (more than ten times in the past four weeks) |  |
| 125   | In the past four weeks, did you or any household member go a whole day and night without eating anything because there was not enough food? | 0 = No (questionnaire is finished) 1 = Yes                                                                                                                               |  |

|                                                                                            |                                              |                                                                                                                                                                          |  |
|--------------------------------------------------------------------------------------------|----------------------------------------------|--------------------------------------------------------------------------------------------------------------------------------------------------------------------------|--|
| 125.10                                                                                     | How often did this happen?                   | 1 = Rarely (once or twice in the past four weeks)<br>2 = Sometimes (three to ten times in the past four weeks)<br>3 = Often (more than ten times in the past four weeks) |  |
| <b>Part : 2 Child medical Condition and Dietary diversity status age 6-59 months</b>       |                                              |                                                                                                                                                                          |  |
| 200                                                                                        | Child sex                                    | Female 2. Male                                                                                                                                                           |  |
| 201                                                                                        | Child age(In months)                         | Age-----                                                                                                                                                                 |  |
| 202                                                                                        | Child Height/Length                          | -----Cm                                                                                                                                                                  |  |
| 203                                                                                        | Child weight                                 | -----Kg                                                                                                                                                                  |  |
| 204                                                                                        | Place of delivery                            | 1. Home 2. Health facility 3. other                                                                                                                                      |  |
| 205                                                                                        | Still breastfeed child                       | 1. yes<br>2. no                                                                                                                                                          |  |
| 206                                                                                        | Diarrhea                                     | 1.Yes 2. No                                                                                                                                                              |  |
| 207                                                                                        | Fever                                        | 1. yes 2. No                                                                                                                                                             |  |
| 208                                                                                        | ARI                                          | 1. yes 2. No                                                                                                                                                             |  |
| 209                                                                                        | Measles                                      | 1. yes 2. No                                                                                                                                                             |  |
| <b>Part : 3 Child feeding practices and Household Food Security status age 6-59 months</b> |                                              |                                                                                                                                                                          |  |
| 300                                                                                        | Age complementary feeding started(In months) | month -----                                                                                                                                                              |  |

|                                    |                                           |                                                                                                                                 |                            |
|------------------------------------|-------------------------------------------|---------------------------------------------------------------------------------------------------------------------------------|----------------------------|
| 301                                | Frequency of complementary feeding by age | Month                                                                                                                           |                            |
|                                    |                                           | 6-8                                                                                                                             | 1. <2 times, 2. ≥2 times   |
|                                    |                                           | 9-11                                                                                                                            | 1. < 3 times, 2. ≥3 times  |
|                                    |                                           | 12-23 and above                                                                                                                 | 1. < 4 times, 2. ≥ 4 times |
| 302                                | Frequency of Brest feeding/day            | 4-7Time 2. ≥8 Times                                                                                                             |                            |
| 303                                | EBF child( In months) consistency         | Month-----                                                                                                                      |                            |
| 304                                | Immunization                              | Yes 2. No                                                                                                                       |                            |
| 305                                | Vitamin A supplementation                 | 1.yes 2. No                                                                                                                     |                            |
| <b>3.1 Dietary Diversity score</b> |                                           |                                                                                                                                 |                            |
|                                    | <b>Food Group</b>                         | <b>Example</b>                                                                                                                  | <b>Yes or No</b>           |
| 306                                | Did the child Eat white tubers and roots? | white potatoes, white yams, white cassava, or other foods made from roots                                                       |                            |
| 307                                | Did the child Eat Vitamin a rich fruits?  | ripe mangoes, cantaloupe, apricots (fresh or dried), ripe papaya, dried peaches + other locally available vitamin A-rich fruits |                            |
| 308                                | Did the child Eat flesh meats?            | beef, pork, lamb, goat, rabbit, wild game, chicken, duck, or other birds                                                        |                            |
| 309                                | EGGS                                      | chicken, duck, guinea hen or any other egg                                                                                      |                            |
| 310                                | OILS AND FATS                             | oil, fats or butter added to food or used for cooking                                                                           |                            |
| 311                                | LEGUMES, NUTS AND SEEDS                   | beans, peas, lentils, nuts, seeds or foods made from these                                                                      |                            |
| 312                                | milk and milk products                    | milk, cheese, yogurt or other milk products                                                                                     |                            |

| <b>Part IV: Maternal characteristics</b>       |                                                                     |                                                     |
|------------------------------------------------|---------------------------------------------------------------------|-----------------------------------------------------|
| 400                                            | Age of mother(years)                                                | Age-----                                            |
| 401                                            | Age at first birth(years)                                           | Age-----                                            |
| 402                                            | Total child born before                                             | No-----                                             |
| 403                                            | Extra food during pregnancy/lactation                               | Yes 2. No                                           |
| 404                                            | Visited health facility for ANC?                                    | Yes 2. No                                           |
| <b>V. Environmental Health characteristics</b> |                                                                     |                                                     |
| 500                                            | Water used in HH per day by liters                                  | Litters-----                                        |
| 501                                            | Time to obtain drinking water (round trip)                          | Time-----                                           |
| 502                                            | HHs treat water by any mean                                         | Yes 2. No                                           |
| 503                                            | Availability of latrine                                             | 1. yes 2. No                                        |
| 504                                            | Materials used to wash hands after toilet                           | Method -----                                        |
| 505                                            | Hand washing practice of mothers/Knowing Critical Hand washing time | 1. Wash frequently 2. Wash less frequently/not wash |
| 506                                            | Method of disposal of HHs waste                                     | 1. Burning /pit 2. Open field                       |
| 507                                            | Source of Drinking water                                            | 1. protected 2. unprotected                         |

**Translated to Amharic... የአማርኛ ቃለ መጠይቅ**

|                                                             |                                          |                                                                 |                  |
|-------------------------------------------------------------|------------------------------------------|-----------------------------------------------------------------|------------------|
| የጥናቱ ቦታ                                                     |                                          | ከተማ -----                                                       |                  |
|                                                             |                                          | ቀበሌ -----                                                       |                  |
| ዳታ ሰብሳቢው ስም _____                                           |                                          | ፊርማ _____                                                       | ቀን<br>___//___// |
| ኮድ (1:2 ጥምረት) በሺተና(1)=ኬዝ108-ኬዝ413,<br>ያልታመመ (2)=ኮን108=ኮን413 |                                          |                                                                 |                  |
| <b>ተ.ቁ</b>                                                  | <b>ክፍል 1: ማሕበራዊ፣ ኢኮኖሚያዊ እና ባህላዊ ጉዳዮች</b> | <b>የመልስ</b>                                                     | <b>ውጣ</b>        |
| 100                                                         | አባውራ                                     | ወንድ 2. ሴት                                                       |                  |
| 101                                                         | የጋብቻ ሁኔታ                                 | 1. ያገባች 2.ያላገባች<br>3. የፈታች 4.ባሏ የሞተባት                           |                  |
| 102                                                         | ብሄር                                      | 1.አማራ 2.ትግሬ 3.አሮሞ<br>4.ሌላ ካለ ይገለጽ                               |                  |
| 103                                                         | እምነት                                     | 1.ኦርቶዶክስ 2.ሙስሊም<br>3.ፕሮቴስታንት 4.ካቶሊክ<br>5.ሌላ ካለ ይገለጽ             |                  |
| 104                                                         | የቤተሰብ ብዛት                                | 1 ----- 2. ከ5አመት በታች<br>ስንት ልጅ አለዎት ?-----                      |                  |
| 105                                                         | የእናት/ያሳዳጊ የትማህርት ሁኔታ                     | 1.ያልተማረች 2. ማንበብና መጻፍ<br>3. 1ኛ ደረጃ 4.ሁለተኛ ደረጃ<br>5. ድሎማና ከዛ በላይ |                  |
| 106                                                         | የአባት የትማህርት ሁኔታ                          | 1.ያልተማረ 2.ማንበብና መጻፍ<br>3. 1ኛ ደረጃ 4..ሁለተኛ ደረጃ                    |                  |

|       |                                                               |                                                                                                                               |    |
|-------|---------------------------------------------------------------|-------------------------------------------------------------------------------------------------------------------------------|----|
|       |                                                               | 5. ድሎማና ከዛ በላይ                                                                                                                |    |
| 107   | የእናት ስራ                                                       | 1. የቤት እመቤት 2. የመንግስት ሰራተኛ<br>3. ነጋዴ 4. ገበሬ 5. የቀን ሰራተኛ<br>6. ተማሪ 7. ሌላ ካለ ይገለጽ-----                                          |    |
| 108   | <b>የአባት ስራ</b>                                                | 1. የመንግስት ሰራተኛ 2. ነጋዴ<br>3. ገበሬ 4. የቀን ሰራተኛ 5. ተማሪ<br>ሌላ ካለ ይገለጽ-----                                                         |    |
| 109   | አማካኝ የቤተሰቡ ወርሃዊ ገቢ ምን ያህል ነው ?                                | ----- ብር                                                                                                                      |    |
| 110   | በገንዘብ ላይ በቤት ውስጥ ውሳኔ ሰጭ ማን ነው?                                | <b>1. አባት 2. እናት 3. ሌላ ሰው-----</b><br>-----                                                                                   |    |
| 111   | የቤት እንስሳት አላቹህ?                                               | 1. አወ 2. የለም                                                                                                                  |    |
| 112   | የቤት እንስሳት ብዛት?                                                | ብዛት-----                                                                                                                      |    |
| 113   | የርሻ መሬት አላችሁ?                                                 | 1. አወ 2. የለም                                                                                                                  |    |
| 114   | ምን ያህል ሄክታር/ጥማድ/ አላችሁ                                         | ሄክታር/ጥማድ/ ብዛት-----                                                                                                            |    |
| 115   | ባለፈው አራት ሳምንት ውስጥ በቤት ውስጥ በቂ ምግብ ባለመኖሩ ተጨንቀው ነበር?             | 0 = የለም (ውጣ ወደ ጥ2)<br>1 = አዎ                                                                                                  | ከድ |
| 115.1 | ለምን ያህል ጊዜ ተከሰተ?                                              | 1 = ያልተለመደ ( አንዴ/ሁለቱ ባለፈው አራት ሳምንት ውስጥ)<br>2 = አልፎ አልፎ (3-10 ጊዜ ባለፈው አራት ሳምንት ውስጥ)<br>3 = ሁልጊዜ (ከ10 ጊዜ በላይ ባለፈው አራት ሳምንት ውስጥ) |    |
| 116   | ባለፈው አራት ሳምንት ውስጥ የቤተሰብ አባል የሆነ በገንዘብ እጥረት ምክንያት የሚፈልገውን የምግብ | 0 = የለም (ውጣ ወደ ጥ3)<br>1 = አዎ                                                                                                  |    |

|       |                                                                                     |                                                                                                                              |  |
|-------|-------------------------------------------------------------------------------------|------------------------------------------------------------------------------------------------------------------------------|--|
|       | አይነት ሳይመገብ የቀረ አለ?                                                                  |                                                                                                                              |  |
| 116.2 | ለምን ያህል ጊዜ ተከሰተ?                                                                    | 1 = ያልተለመደ ( አንዴ/ሁለቴ ባለፈው አራት ሳምንት ውስጥ)<br>2 = አልፎ አልፎ (3-10 ጊዜ ባለፈው አራት ሳምንት ውስጥ)<br>3 = ሁልጊዜ (ከ10 ጊዜ በላይባለፈው አራት ሳምንት ውስጥ) |  |
| 117   | በቂ አቅርቦት ባለመኖሩ ምክንያት ባለፈው አራት ሳምንት ውስጥ የቤተሰብ አባል የሆነ በቂ ያልሆነ የተመጣጠነ ምግብ በልቶአል ?     | 0 = የለም (ውጣ ወደ ጥ4)<br>1= አዎ                                                                                                  |  |
| 117.3 | ለምን ያህል ጊዜ ተከሰተ?                                                                    | 1 = ያልተለመደ ( አንዴ/ሁለቴ ባለፈው አራት ሳምንት ውስጥ)<br>2 = አልፎ አልፎ (3-10 ጊዜ ባለፈው አራት ሳምንት ውስጥ)<br>3 = ሁልጊዜ (ከ10 ጊዜ በላይባለፈው አራት ሳምንት ውስጥ) |  |
| 118   | ባለፈው አራት ሳምንት ውስጥ የቤተሰብ አባል የሆነ መመገብ የሚፈልገውን ምግብ በልቶአል ሌላ የሚፈልገውን ምግብ ባለማግኘቱ ምክንያት? | 0 = የለም (ውጣ ወደ ጥ5)<br>1= አዎ                                                                                                  |  |
| 118.4 | ለምን ያህል ጊዜ ተከሰተ?                                                                    | 1 = ያልተለመደ ( አንዴ/ሁለቴ ባለፈው አራት ሳምንት ውስጥ)<br>2 = አልፎ አልፎ (3-10 ጊዜ ባለፈው አራት ሳምንት ውስጥ)<br>3 = ሁልጊዜ (ከ10 ጊዜ በላይባለፈው አራት ሳምንት ውስጥ) |  |
| 119   | ባለፈው አራት ሳምንት ውስጥ የቤተሰብ አባል                                                         | 0 = የለም (ውጣ ወደ ጥ6)                                                                                                           |  |

|       |                                                                         |                                                                                                                              |  |
|-------|-------------------------------------------------------------------------|------------------------------------------------------------------------------------------------------------------------------|--|
|       | የሆነ አነስተኛ ምግብ ተመግባል በቂ ምግብ ባለመኖሩ ምክንያት?                                 | 1= አዎ                                                                                                                        |  |
| 119.5 | ለምን ያህል ጊዜ ተከሰተ?                                                        | 1 = ያልተለመደ ( አንዴ/ሁለቴ ባለፈው አራት ሳምንት ውስጥ)<br>2 = አልፎ አልፎ (3-10 ጊዜ ባለፈው አራት ሳምንት ውስጥ)<br>3 = ሁልጊዜ (ከ10 ጊዜ በላይባለፈው አራት ሳምንት ውስጥ) |  |
| 120   | ባለፈው አራት ሳምንት ውስጥ የቤተሰብ አባል የሆነ አነስተኛ ምግብ ተመግባል በቂ ምግብ ባለመኖሩ ምክንያት?     | 0 = የለም (ውጣ ወደ ጥ6)<br>1= አዎ                                                                                                  |  |
| 120.6 | ለምን ያህል ጊዜ ተከሰተ?                                                        | 1 = ያልተለመደ ( አንዴ/ሁለቴ ባለፈው አራት ሳምንት ውስጥ)<br>2 = አልፎ አልፎ (3-10 ጊዜ ባለፈው አራት ሳምንት ውስጥ)<br>3 = ሁልጊዜ (ከ10 ጊዜ በላይባለፈው አራት ሳምንት ውስጥ) |  |
| 121   | ባለፈው አራት ሳምንት ውስጥ የቤተሰብ አባል የሆነ በጣም አነስተኛ ምግብ ተመግባል በቂ ምግብ ባለመኖሩ ምክንያት? | 0 = የለም (ውጣ ወደ ጥ7)<br>1= አዎ                                                                                                  |  |
| 121.7 | ለምን ያህል ጊዜ ተከሰተ?                                                        | 1 = ያልተለመደ ( አንዴ/ሁለቴ ባለፈው አራት ሳምንት ውስጥ)<br>2 = አልፎ አልፎ (3-10 ጊዜ ባለፈው አራት ሳምንት ውስጥ)<br>3 = ሁልጊዜ (ከ10 ጊዜ በላይባለፈው አራት ሳምንት ውስጥ) |  |

|        |                                                                                          |                                                                                                                                       |  |
|--------|------------------------------------------------------------------------------------------|---------------------------------------------------------------------------------------------------------------------------------------|--|
| 122    | <p>ባለፈው አራት ሳምንት ውስጥ ምግብ በቤት ውስጥ ጠፍቶ ያውቃል በቂ አቅርቦት ባለመኖሩ ምክንያት?</p>                      | <p>0 = የለም (ውጣ ወደ ጥ8)<br/>1 = አዎ</p>                                                                                                  |  |
| 122.8  | <p>ለምን ያህል ጊዜ ተከሰተ?</p>                                                                  | <p>1 = ያልተለመደ ( አንዴ/ሁለቴ ባለፈው አራት ሳምንት ውስጥ)<br/>2 = አልፎ አልፎ (3-10 ጊዜ ባለፈው አራት ሳምንት ውስጥ)<br/>3 = ሁልጊዜ (ከ10 ጊዜ በላይባለፈው አራት ሳምንት ውስጥ)</p> |  |
| 123    | <p>ባለፈው አራት ሳምንት ውስጥ የቤተሰብ አባል የሆነ ከተኛ በሁላ የራብው ሰው አለ በቂ ምግብ ባለመኖሩ/ባለመመገቡ ምክንያት ?</p>    | <p>0 = የለም (ውጣ ወደ ጥ9)<br/>1 = አዎ</p>                                                                                                  |  |
| 123.9  | <p>ለምን ያህል ጊዜ ተከሰተ?</p>                                                                  | <p>1 = ያልተለመደ ( አንዴ/ሁለቴ ባለፈው አራት ሳምንት ውስጥ)<br/>2 = አልፎ አልፎ (3-10 ጊዜ ባለፈው አራት ሳምንት ውስጥ)<br/>3 = ሁልጊዜ (ከ10 ጊዜ በላይባለፈው አራት ሳምንት ውስጥ)</p> |  |
| 124    | <p>ባለፈው አራት ሳምንት ውስጥ የበተሰብ አባል የሆነ ሙሉ ቀን እና ለሌት ምግብ ሳይበላ የዋለ/ያደረ/አለ ምግብ ባለመኖሩ ምክንያት?</p> | <p>0 = የለም (ጥያቄው አለቀ)<br/>1 = አዎ</p>                                                                                                  |  |
| 124.10 | <p>ለምን ያህል ጊዜ ተከሰተ?</p>                                                                  | <p>1 = ያልተለመደ ( አንዴ/ሁለቴ ባለፈው አራት ሳምንት ውስጥ)<br/>2 = አልፎ አልፎ (3-10 ጊዜ ባለፈው አራት ሳምንት ውስጥ)<br/>3 = ሁልጊዜ (ከ10 ጊዜ በላይባለፈው አራት ሳምንት ውስጥ)</p> |  |

|     |                                                                            |                 |                     |
|-----|----------------------------------------------------------------------------|-----------------|---------------------|
|     |                                                                            | ሳምንት ውስጥ)       |                     |
|     |                                                                            |                 |                     |
|     | <b>ክፍል 2. የህጻናት ጤና እና የአመጋገብ ሁኔታን በተመለከተ ከ 6-59 ወር</b>                     |                 |                     |
| 200 | የልጅዎ ፃታ                                                                    | 1.ወንድ           | 2.ሴት                |
| 201 | የልጅዎ እድሜ                                                                   | ወር -----        |                     |
| 202 | የልጁ/ጄ ቁመት/ርዝመት                                                             | -----ሴሜ         |                     |
| 203 | የልጁ/ጄ ክብደት                                                                 | -----ኪግ         |                     |
| 204 | ልጅሽን የት ወለድሽ?                                                              | 1. ቤት ውስጥ       | 2. ጤና ተቋም 3. ሌላ     |
| 205 | ጡት እያጠባሸ ነው?                                                               | 1. አዎ<br>2. የለም |                     |
| 206 | ጡት ያለጠባሸበት ምክንያት ምንድን ነው?                                                  | ምክንያት-----      |                     |
| 208 | ተቅማጥ ነበረው ባለፈው ሶስት ወር ውስጥ?                                                 | 1.አዎ            | 2. የለውም             |
| 209 | ሙቀት ነበረው /ራት ባለፈው ሶስት ወር ውስጥ ?                                             | 1.አዎ            | 2. የለውም             |
| 210 | የላይኛው የመተንፈሻ ክፍል ችግር ነበረው/ራት ባለፈው ሶስት ወር ውስጥ ?                             | 1.አዎ            | 2. የለውም             |
| 211 | ኩፍኝ ባለፈው ሶስት ወር ውስጥ ነበረው/ራት?                                               | 1.አዎ            | 2. የለውም             |
|     | <b>ክፍል : 3 6-59 ወር የሆኑ ህጻናት የአመጋገብ ስርአትን እና የቤት የምግብ ዋስትናን ሁኔታን በተመለከተ</b> |                 |                     |
| 300 | ተጨማሪ ምግብ መቸ ጀመርሺለት/ለት?                                                     | ወር-----         |                     |
| 301 | ተጨማሪ ምግብ በቀን እና በድሜበተመለከተ                                                  | Month           |                     |
|     |                                                                            | 6-8             | 1. < 2 ጊዜ, 2. ≥2 ጊዜ |
|     |                                                                            | 9-11            | 1. < 3 ጊዜ, 2. ≥3    |

|     |                                             | ጊዜ                                    |                   |
|-----|---------------------------------------------|---------------------------------------|-------------------|
|     |                                             | 1. < 4 ጊዜ, 2. ≥4 ጊዜ                   |                   |
|     |                                             | 12-24 እና ከዛ በላይ                       |                   |
| 302 | በቀን ምን ያህል ጊዜ ታጠቢአለሽ?                       | 4-7 ጊዜ 2. ≥8 ጊዜ                       |                   |
| 303 | የናት ጡት ብቻ ለስንት ወር ጠባቾ                       | ወር-----                               |                   |
| 304 | ክትባት ወስዷል/ለች                                | አወ 2. አልወሰደም                          |                   |
|     | ሻይታሚን ኤ ወስዷል/ለች                             | አወ 2. አልወሰደም                          |                   |
|     | <b>2.1 6-59 ወር የሀጻናት የአመጋገብ ሁኔታን በተመለከተ</b> |                                       |                   |
|     | <b>የምግብ ክፍል</b>                             | <b>ምሳሌ</b>                            | <b>አወ ወይም የለም</b> |
| 305 | ህጻኑ/ኗ የስር ዘር ምግቦች ተመግቦአል/ለች?                | ነጭ ድንች ፣ ስኳር ድንች ፣ ቀይስር እና ሌሎች የስር ዘር |                   |
| 306 | ህጻኑ/ኗ በሻይታሚን ኤ የበለጸጉ ምግቦች ተመግቦአል/ለች?        | ማንጎ፣ ፓፓያ፣ ሙዝ፣ ኮከ ወ.ዘ.ተ                |                   |
| 307 | ህጻኑ/ኗ ስጋ ተመግቦአል/ለች?                         | የፍየል/በግ፣ የደሮ፣ የከብት                    |                   |
| 308 | ህጻኑ/ኗ እንቁላል ተመግቦአል/ለች?                      | የደሮ                                   |                   |
| 309 | ህጻኑ/ኗ ቅባት ያለው ምግብ ተመግቦአል/ለች?                | ዘይት፣ ቅቤ ወ.ዘ.ተ                         |                   |
| 310 | ህጻኑ/ኗ ጥራጥሬ፣ የቅባት ዘር ተመግቦአል/ለች?              | ባቄላ፣ ሺምብራ፣ ለውዝ፣ አተር ወ.ዘ.ተ             |                   |
| 311 | ህጻኑ/ኗ ወተት እና የወተት ተዋጽኦ ተመግቦአል/ለች?           | ወተት፣ አይብ፣ እርጎ                         |                   |
|     | <b>ክፍል: 4 የናት ሁኔታ በተመለከተ</b>                |                                       |                   |
| 400 | የናት እድሜ                                     | እድሜ-----                              |                   |
| 401 | የመጀመርያ ልጅሽን በስንት አመትሽ ወለድሽ                  | እድሜ-----                              |                   |
| 402 | ምን ያህል ልጆች ወለድሽ                             | ብዛት-----                              |                   |
| 403 | ተጨማሪ ምግብ በርግዝና እና ጡት ማጥባት ጊዜ                | 1. አወ 2. አልወሰድኩም                      |                   |

|     |                                   |                   |  |
|-----|-----------------------------------|-------------------|--|
|     | ትወስኛ ነበር?                         |                   |  |
| 404 | ቅድመወሊድ ክትትል ታደርገን ነበር?            | 1.አወ 2. አላደረጉም    |  |
|     | <b>ክፍል 5. የአካባቢ ጤና በተመለከተ</b>     |                   |  |
| 500 | ምን ያህል ውሀ በ ሊትር በቀን ትጠቀማላችሁ?      | ሊትር-----          |  |
| 501 | ምን ያህል ጊዜ ይፈጅብኛል ውሀ ለመቅዳት?        | ሰአት-----          |  |
| 502 | የውሀ ማከሚያ መዳሀኒት ትጠቀማላሁ?            | አወ 2. አንጠቀምም      |  |
| 503 | ሺንት ቤት አላችሁ?                      | 1. አወ 2. የለንም     |  |
| 504 | ወሳኝ የእጅ መታጠብያ ጊዜ ሚባሉትን ታውቁቸው አለሽ? | አወ 2.አላውቅም        |  |
| 505 | ቆሻሻን ለማስወገድ የምትጠቀሙት ዘዴ ምንድን ነው?   | ዘዴ-----           |  |
| 506 | ምትጠጡት የውሀ አይነት ምንድን ነው?           | 1.የተጠበቀ 2. ያልተጠበቀ |  |
